# Supplementary material for: Supramolecular assembly in a Janus-type urea system
Source: Royal Society of Chemistry journal article supplement (doi:10.1039/c3cc48603f), 2013-12-10
Supplement: c3cc48603f.pdf [file c3cc48603f.pdf]

# Supramolecular Assembly in a Janus-Type Urea System

Gareth O. Lloyd<sup>a\*</sup> and Jonathan W. Steed<sup>b\*</sup>

## Supplementary Information

### Synthesis

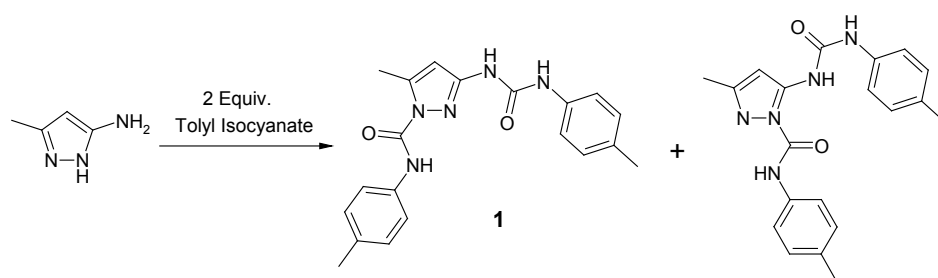

**Scheme S1** Synthesis of **1** and its regioisomer.

**Synthesis of 1:** 3-amino-5-methylpyrazole (1.00 g, 10.3 mmol) was added to dry CHCl<sub>3</sub> (100 mL) in a three necked round bottom flask fitted with a condenser and flowing N<sub>2</sub>. To this solution was added *p*-tolyl isocyanate (2.74 g, 2.60 ml, 20.6 mmol) dropwise. The solution was refluxed for 24 hours under N<sub>2</sub>. The solvent was removed using a rotary evaporator to give a crystalline solid of a mixture of isomers. Compound 1-(1-(*p*-tolylcarbamoyl)-5-methyl-1*H*-pyrazol-3-yl)-3-*p*-tolylurea (**1**) was isolated by crystallisation from hot CHCl<sub>3</sub> and the crystalline material filtered hot. Solid was washed with hot CHCl<sub>3</sub> (15 ml). **Yield:** 0.79 g; 33%, 0.34 mmol. **<sup>1</sup>H NMR:** (400 MHz, *d*<sub>6</sub>-DMSO, δ/ppm, *J*/Hz) 2.22 (3H, singlet, -CH<sub>3</sub>) 2.51 (3H, singlet, -CH<sub>3</sub>) 3.32 (3H, singlet, -CH<sub>3</sub>) 6.44 (1H, singlet, =CH-) 7.08 (2H, doublet, *J* = 6.4; -CH=(tolyl)) 7.14 (2H, doublet, *J* = 7.2; -CH=(tolyl)) 7.34 (2H, doublet, *J* = 6.4; -CH=(tolyl)) 7.53 (2H, doublet, *J* = 7.2; -CH=(tolyl)) 8.99 (1H, singlet, -NH-) 9.12 (1H, singlet, -NH-) 9.81 (1H, singlet, -NH-). **<sup>13</sup>C NMR:** (100 MHz, *d*<sub>6</sub>-DMSO, δ/ppm) 13.8, 20.3, 20.4, 101.4, 118.4, 121.2, 129.0, 129.1, 131.2, 133.0, 134.5, 136.5, 143.2, 148.4, 148.6, 151.7. **Elemental analysis:** Calc. C 65.9% H 5.93% N 19.2% Exp. C 66.1% H 5.82% N 19.3%. **Melting point:** 158 +/- 2 °C. **Mass Spectra:** ES<sup>+</sup> *m/z* = 231 [100%] C<sub>20</sub>H<sub>21</sub>N<sub>5</sub>O<sub>2</sub> - C<sub>8</sub>H<sub>7</sub>N<sub>4</sub>O<sub>1</sub> + H<sup>+</sup>, *m/z* = 364 [34%] C<sub>20</sub>H<sub>21</sub>N<sub>5</sub>O<sub>2</sub> + H<sup>+</sup>, *m/z* = 386 [78%] C<sub>20</sub>H<sub>21</sub>N<sub>5</sub>O<sub>2</sub> + Na<sup>+</sup>, *m/z* = 749 [45%] 2C<sub>20</sub>H<sub>21</sub>N<sub>5</sub>O<sub>2</sub> + Na<sup>+</sup>. **FT-IR:** (ν, cm<sup>-1</sup>) 3382 (m), 3283 (m), 3136 (w), 3037 (W), 2977 (w), 2923 (w), 2866 (w), 1732 (m), 1648 (m), 1594 (m).

Crystal data for **1** (form I): C<sub>20</sub>H<sub>21</sub>N<sub>5</sub>O<sub>2</sub>, *M* = 363.42, Colourless Needle, 0.31 × 0.14 × 0.06 mm<sup>3</sup>, triclinic, space group *P*-1 (No. 2), *a* = 5.8615(2), *b* = 11.0671(4), *c* = 14.0882(5) Å, α = 91.1250(10), β = 98.7050(10), γ = 97.0080(10)°, *V* = 895.95(5) Å<sup>3</sup>, *Z* = 2, *D*<sub>c</sub> = 1.347 g/cm<sup>3</sup>, *F*<sub>000</sub> = 384, Smart 6K, MoKα radiation, λ = 0.71073 Å, *T* = 120(2)K, 2θ<sub>max</sub> = 61.0°, 16676 reflections collected, 5478 unique (*R*<sub>int</sub> = 0.0371). Final *Goof* = 1.026, *RI* = 0.0511, *wR2* = 0.1364, *R* indices based on 3835 reflections with *I* > 2σ(*I*) (refinement on *F*<sup>2</sup>), 245 parameters, 0 restraints. Lp and absorption corrections applied, μ = 0.091 mm<sup>-1</sup>.

Crystal data for **1** (form II): C<sub>20</sub>H<sub>21</sub>N<sub>5</sub>O<sub>2</sub>, *M* = 363.42, Colourless Needle, 0.27 × 0.16 × 0.09 mm<sup>3</sup>, triclinic, space group *P*-1 (No. 2), *a* = 4.594(4), *b* = 7.122(6), *c* = 28.06(3) Å, α = 93.46(2), β = 92.554(15), γ = 104.922(15)°, *V* = 883.7(14) Å<sup>3</sup>, *Z* = 2, *D*<sub>c</sub> = 1.370 g/cm<sup>3</sup>, *F*<sub>000</sub> = 384, Smart-6K, MoKα radiation, λ = 0.71073 Å, *T* = 100(2)K, 2θ<sub>max</sub> = 50.0°, 1788 reflections collected, 1780 unique (*R*<sub>int</sub> = 0.0000). Final *Goof* = 1.071, *RI* = 0.0698, *wR2* = 0.2140, *R* indices based on 1359 reflections with *I* > 2σ(*I*) (refinement on *F*<sup>2</sup>), 250 parameters, 69 restraints. Lp and absorption corrections applied, μ = 0.092 mm<sup>-1</sup>.

Crystal data for [{Cu(μ-κ-*O,O,N,N*-**1**)(MeOH)}<sub>6</sub>](MeCO<sub>2</sub>)<sub>6</sub>·6MeOH: C<sub>144</sub>H<sub>186</sub>Cu<sub>6</sub>N<sub>30</sub>O<sub>36</sub>, *M* = 3294.53, Blue Prism, 0.13 × 0.11 × 0.05 mm<sup>3</sup>, trigonal, space group *R*-3 (No. 148), *a* = *b* = 31.7325(8), *c* = 13.6585(7) Å, *V* = 11910.8(10) Å<sup>3</sup>, *Z* = 3, *D*<sub>c</sub> = 1.378 g/cm<sup>3</sup>, *F*<sub>000</sub> = 5166, SMart - 6K, MoKα radiation, λ = 0.71073 Å, *T* =

120(2)K,  $2\theta_{\max} = 50.0^\circ$ , 22616 reflections collected, 4635 unique ( $R_{\text{int}} = 0.1729$ ). Final  $Goof = 0.811$ ,  $RI = 0.0530$ ,  $wR2 = 0.1140$ ,  $R$  indices based on 1988 reflections with  $I > 2\sigma(I)$  (refinement on  $F^2$ ), 331 parameters, 3 restraints. Lp and absorption corrections applied,  $\mu = 0.872 \text{ mm}^{-1}$ . **Mass Spectrum:**  $ES^+ m/z = 364$  [10%] ( $C_{20}H_{21}N_5O_2$ ) +  $H^+$ ,  $m/z = 386$  [38%] ( $C_{20}H_{21}N_5O_2$ ) +  $Na^+$ ,  $m/z = 457$  [100%] ( $C_{21}H_{24}CuN_5O_3$ ) = (Cu +  $1^-$  + MeOH),  $m/z = 788$  [95%]  $C_{40}H_{40}CuN_{10}O_4$  +  $H^+$  = (Cu +  $2(1^-)$  +  $H^+$ ),  $m/z = 1574$  [12%]  $6(C_{23}H_{27}CuN_5O_5) + 2Na^+$

Crystal data for *mer*-[Cd( $\kappa$ -O,*N,N,N*-1) $_2$ ] · 2MeOH · 2H<sub>2</sub>O:  $C_{42}H_{48}CdN_{10}O_8$ ,  $M = 933.30$ , colourless block,  $0.11 \times 0.07 \times 0.04 \text{ mm}^3$ , monoclinic, space group  $P2_1$  (No. 4),  $a = 12.329(7)$ ,  $b = 12.877(7)$ ,  $c = 14.883(6) \text{ \AA}$ ,  $\beta = 91.625(18)^\circ$ ,  $V = 2362(2) \text{ \AA}^3$ ,  $Z = 2$ ,  $D_c = 1.312 \text{ g/cm}^3$ ,  $F_{000} = 964$ , Smart 6K, MoK $\alpha$  radiation,  $\lambda = 0.71073 \text{ \AA}$ ,  $T = 120(2) \text{ K}$ ,  $2\theta_{\max} = 50.0^\circ$ , 13397 reflections collected, 8279 unique ( $R_{\text{int}} = 0.0583$ ). Final  $Goof = 1.038$ ,  $RI = 0.0712$ ,  $wR2 = 0.1631$ ,  $R$  indices based on 6016 reflections with  $I > 2\sigma(I)$  (refinement on  $F^2$ ), 561 parameters, 1 restraint. Lp and absorption corrections applied,  $\mu = 0.521 \text{ mm}^{-1}$ . Absolute structure parameter =  $0.02(5)$  (Flack, H. D. *Acta Cryst.* **1983**, *A39*, 876-881).

## Crystal packing energy calculations

### Ligand 1 form I

Gavezzotti, A., *Acc. Chem. Res.* 1994, 27, 309-314

Gavezzotti, A., Filippini, G., *J. Phys. Chem.*, 1994, 98 (18), 4831-4837

Calculated inter-molecular potentials:

mol1 mol2 distance energy (kJ/mol)

0 1 5.8615 -87.9503

0 2 8.93579 -59.8004

0 3 8.08581 -59.6

Hydrogen normalisation: On

Packing Energy:

PE = -161.71 kJ/mol 40 interactions

PE = -165.09 kJ/mol 120 interactions

PE = -165.45 kJ/mol 160 interactions

PE = -165.55 kJ/mol 180 interactions

PE = -165.59 kJ/mol 190 interactions

PE = -165.62 kJ/mol 200 interactions

Potential =  $A \cdot \exp(-Br) - Cr(-6)$

Unified (UNI) pair-potential parameters:

| atom1 | code1 | atom2 | code2 | A          | B    | C      |
|-------|-------|-------|-------|------------|------|--------|
| O1    | 17    | O1    | 17    | 195309.1   | 3.74 | 1335.0 |
| O1    | 17    | N1    | 23    | 268571.0   | 3.86 | 1523.0 |
| O1    | 17    | C1    | 3     | 393086.8   | 3.74 | 2682.0 |
| O1    | 17    | H1E   | 1     | 295432.3   | 4.82 | 439.3  |
| O1    | 17    | N3    | 19    | 268571.0   | 3.86 | 1523.0 |
| O1    | 17    | H3N   | 27    | 15095080.0 | 7.78 | 995.8  |
| N1    | 23    | N1    | 23    | 365263.0   | 3.65 | 2891.0 |
| N1    | 23    | C1    | 3     | 491494.0   | 3.86 | 2791.0 |
| N1    | 23    | H1E   | 1     | 228279.0   | 4.52 | 502.1  |
| N1    | 23    | N3    | 19    | 365263.2   | 3.65 | 2891.0 |
| N1    | 23    | H3N   | 27    | 30190070.0 | 7.78 | 1992.0 |
| C1    | 3     | C1    | 3     | 226145.2   | 3.47 | 2418.0 |
| C1    | 3     | H1E   | 1     | 120792.1   | 4.10 | 472.8  |
| C1    | 3     | N3    | 19    | 491494.0   | 3.86 | 2791.0 |
| C1    | 3     | H3N   | 27    | 120792.1   | 4.10 | 472.8  |
| H1E   | 1     | H1E   | 1     | 24158.0    | 4.01 | 109.2  |

|     |    |     |    |          |      |        |
|-----|----|-----|----|----------|------|--------|
| H1E | 1  | N3  | 19 | 228279.0 | 4.52 | 502.1  |
| H1E | 1  | H3N | 27 | 24158.0  | 4.01 | 109.2  |
| N3  | 19 | N3  | 19 | 365263.2 | 3.65 | 2891.0 |
| N3  | 19 | H3N | 27 | 228279.0 | 4.52 | 502.1  |
| H3N | 27 | H3N | 27 | 24158.0  | 4.01 | 109.2  |

### Ligand 1 form II

Notes:

close contact of 1.98265 found between O1 and H3N  
close contact of 1.86915 found between O1 and H4N  
close contact of 1.74834 found between H19 and H1B

Calculated inter-molecular potentials:

mol1 mol2 distance energy (kJ/mol)

|   |   |         |          |
|---|---|---------|----------|
| 0 | 1 | 4.5914  | -131.358 |
| 0 | 2 | 7.40409 | -31.4151 |
| 0 | 3 | 7.115   | -24.7166 |

Hydrogen normalisation: On

Packing Energy:

|                     |                  |
|---------------------|------------------|
| PE = -238.64 kJ/mol | 40 interactions  |
| PE = -243.23 kJ/mol | 120 interactions |
| PE = -243.58 kJ/mol | 160 interactions |
| PE = -243.67 kJ/mol | 180 interactions |
| PE = -243.71 kJ/mol | 190 interactions |
| PE = -243.74 kJ/mol | 200 interactions |

Potential =  $A \cdot \exp(-Br) - Cr(-6)$

Unified (UNI) pair-potential parameters:

| atom1 | code1 | atom2 | code2 | A          | B    | C      |
|-------|-------|-------|-------|------------|------|--------|
| O1    | 17    | O1    | 17    | 195309.1   | 3.74 | 1335.0 |
| O1    | 17    | N1    | 23    | 268571.0   | 3.86 | 1523.0 |
| O1    | 17    | C1    | 3     | 393086.8   | 3.74 | 2682.0 |
| O1    | 17    | H1B   | 1     | 295432.3   | 4.82 | 439.3  |
| O1    | 17    | N3    | 19    | 268571.0   | 3.86 | 1523.0 |
| O1    | 17    | H3N   | 27    | 15095080.0 | 7.78 | 995.8  |
| N1    | 23    | N1    | 23    | 365263.0   | 3.65 | 2891.0 |
| N1    | 23    | C1    | 3     | 491494.0   | 3.86 | 2791.0 |
| N1    | 23    | H1B   | 1     | 228279.0   | 4.52 | 502.1  |
| N1    | 23    | N3    | 19    | 365263.2   | 3.65 | 2891.0 |
| N1    | 23    | H3N   | 27    | 30190070.0 | 7.78 | 1992.0 |
| C1    | 3     | C1    | 3     | 226145.2   | 3.47 | 2418.0 |
| C1    | 3     | H1B   | 1     | 120792.1   | 4.10 | 472.8  |
| C1    | 3     | N3    | 19    | 491494.0   | 3.86 | 2791.0 |
| C1    | 3     | H3N   | 27    | 120792.1   | 4.10 | 472.8  |
| H1B   | 1     | H1B   | 1     | 24158.0    | 4.01 | 109.2  |
| H1B   | 1     | N3    | 19    | 228279.0   | 4.52 | 502.1  |
| H1B   | 1     | H3N   | 27    | 24158.0    | 4.01 | 109.2  |
| N3    | 19    | N3    | 19    | 365263.2   | 3.65 | 2891.0 |
| N3    | 19    | H3N   | 27    | 228279.0   | 4.52 | 502.1  |
| H3N   | 27    | H3N   | 27    | 24158.0    | 4.01 | 109.2  |
